# Supplementary material for: Synthesis of penta- and hexa(3,4-thienylene): size-dependent structural properties of cyclic oligothiophenes
Source: Royal Society of Chemistry journal article supplement (doi:10.1039/d3cc03508e), 2023-01-01

## Supporting Information

---

### **Synthesis of penta- and hexa(3,4-thienylene): Size-dependent structural properties of cyclic oligothiophenes**

Mai Nagase,<sup>a,b</sup> Sachiko Nakano,<sup>a</sup> and Yasutomo Segawa<sup>\*a,b</sup>

<sup>a</sup> *Institute for Molecular Science, Myodaiji, Okazaki, 444-8787, Japan*

<sup>b</sup> *The Graduate University for Advanced Studies, SOKENDAI, Myodaiji, Okazaki, 444-8787, Japan*

E-mail: segawa@ims.ac.jp

---

### **Table of Contents**

|                                                                      |         |
|----------------------------------------------------------------------|---------|
| 1. Experimental Section                                              | S2–S7   |
| 2. X-ray Crystallography                                             | S8–S9   |
| 3. Photophysical Measurement                                         | S9      |
| 4. Computational Study                                               | S10–S12 |
| 5. References                                                        | S13     |
| 6. <sup>1</sup> H, <sup>13</sup> C NMR, and Mass Spectra of Products | S14–S23 |

## 1. Experimental Section

### General

Unless otherwise noted, all materials were obtained from commercial suppliers and used without further purification. Tetrahydrofuran (THF) and toluene for reactions were purified by passing through a solvent purification system (Glass Contour). All reactions were performed with dry solvents under an atmosphere of nitrogen in dried glassware with standard vacuum-line techniques. Work-up and purification procedures were carried out with reagent-grade solvents under air. 3,4-Bis(4,4,5,5-tetramethyl-1,3,2-dioxaborolan-2-yl)thiophene (**1**),<sup>S1</sup> 4,4'-dibromo-3,3'-bithiophene (**3**)<sup>S2</sup> and tetra(3,4-thienylene) (**4T**)<sup>S3</sup> were synthesized according to reported procedure.

Analytical thin-layer chromatography (TLC) was performed using E. Merck silica gel 60 F254 precoated plates (0.25 mm). The developed chromatograms were analyzed by UV lamp (254 or 365 nm). Silica gel column chromatography was performed with KANTO Silica Gel 60N (spherical, neutral, 40-100  $\mu$ m) or Biotage Isolera<sup>®</sup> equipped with Biotage<sup>®</sup> Sfar Silica D Duo 60  $\mu$ m columns. Preparative recycling gel permeation chromatography (GPC) was performed with a YMC LC-forte/R instrument equipped with JAIGEL-1HH (20 mm I.D.  $\times$  600 mm) and JAIGEL-2HH columns (20 mm I.D.  $\times$  600 mm) using chloroform (CHCl<sub>3</sub>) as an eluent. The high-resolution mass spectra (HRMS) were obtained from a Bruker Daltonics maXis (ESI-TOF MS) or a Bruker Daltonics microflex LRF (MALDI-TOF MS) with 7,7,8,8-tetracyanoquinodimethane (TCNQ) as matrix for **4**, **5T**, **5** and **6T**, and silver trifluoroacetate (AgTFA) as cationizing agent for **4** and **5**. Melting points were measured on a MPA100 Optimelt automated melting point system. Nuclear magnetic resonance (NMR) spectra were recorded on a JEOL JNM-ECS400 (<sup>1</sup>H 400 MHz, <sup>13</sup>C 100 MHz) spectrometer. Chemical shifts for <sup>1</sup>H NMR are expressed in parts per million (ppm) relative to CHCl<sub>3</sub> ( $\delta$  7.26 ppm), CHDCl<sub>2</sub> ( $\delta$  5.32 ppm) or C<sub>2</sub>HDCl<sub>4</sub> ( $\delta$  5.98 ppm). Chemical shifts for <sup>13</sup>C NMR are expressed in ppm relative to CDCl<sub>3</sub> ( $\delta$  77.16 ppm) or CD<sub>2</sub>Cl<sub>2</sub> ( $\delta$  53.84 ppm). Data are reported as follows: chemical shift, multiplicity (s = singlet, d = doublet, br = broad signal), coupling constant (Hz), and integration.

### Synthesis of 4,4'''-dibromo-3,3':4',3'':4'',3''':4''',3''''-quinquethiophene (**4**)

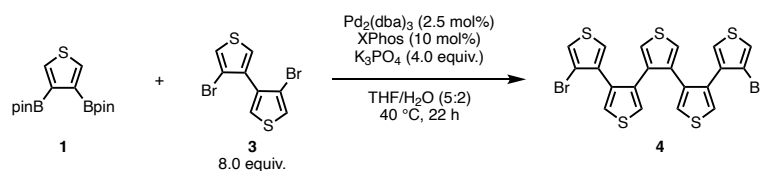

To a 500-mL three-necked round bottom flask containing a magnetic stirring bar were added **1** (2.36 g, 7.02 mmol, 1.0 equiv.), **3** (18.2 g, 56.1 mmol, 8.0 equiv.), 2-dicyclohexylphosphino-2',4',6'-triisopropylbiphenyl (XPhos; 335 mg, 0.700 mmol, 10 mol%), tripotassium phosphate *n*-hydrate ( $\text{K}_3\text{PO}_4 \cdot n\text{H}_2\text{O}$ ; 7.45 g, 28.1 mmol, 4.0 equiv.), and tris(dibenzylideneacetone)dipalladium(0) ( $\text{Pd}_2(\text{dba})_3$ ; 161 mg, 0.175 mmol, 2.5 mol%). The flask was then evacuated and backfilled with nitrogen three times, and THF (110 mL) and degassed water (45.0 mL) were then added into the flask. The reaction mixture was stirred at 40 °C for 22 h. After quenching the reaction mixture by saturated aqueous ammonium chloride solution, the mixture was extracted with ethyl acetate, washed with water and brine, dried over  $\text{Na}_2\text{SO}_4$ , and then evaporated *in vacuo*. The crude residue was purified by short-path silica gel with dry loading (eluent: hexane, then  $\text{CHCl}_3$ ), then silica gel column chromatography (eluent: hexane/ $\text{CHCl}_3$  = 100:0 to 90:10) to afford **4** as an opaque white solid (2.91 g, 73%).

$^1\text{H}$  NMR (400 MHz,  $\text{CDCl}_3$ ):  $\delta$  7.25 (d,  $J$  = 3.4 Hz, 2H), 7.11 (d,  $J$  = 3.5 Hz, 2H), 7.06 (s, 2H), 6.67 (d,  $J$  = 3.4 Hz, 2H), 6.49 (d,  $J$  = 3.5 Hz, 2H);  $^{13}\text{C}$  NMR (100 MHz,  $\text{CDCl}_3$ ):  $\delta$  136.8 (4°), 136.7 (4°), 136.5 (4°), 133.8 (4°), 125.0 (CH), 124.7 (CH), 123.7 (CH), 123.1 (CH), 122.7 (CH), 112.1 (4°); HRMS (MALDI-TOF MS)  $m/z$  calcd for  $\text{C}_{20}\text{H}_{10}\text{Br}_2\text{S}_5$  [ $\text{M}+\text{Ag}$ ] $^+$ : 674.680, found: 674.679; mp: 159.1–161.8 °C.

### Synthesis of penta(3,4-thienylene) (**5T**)

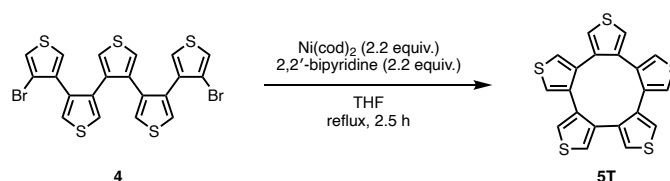

To a 1-L three-necked flask containing a magnetic stirring bar were added **4** (509 mg, 0.892 mmol, 1.0 equiv.) and 2,2'-bipyridine (306 mg, 1.96 mmol, 2.2 equiv.). The flask was then evacuated and backfilled with nitrogen three times, and THF (440 mL) and bis(1,5-cyclooctadiene)nickel(0) (Ni(cod)<sub>2</sub>; 540 mg, 1.96 mmol, 2.2 equiv.) were then added into the flask. The reaction mixture was refluxed for 2.5 h. After cooling the mixture to room temperature, the reaction mixture was passed through short-path silica gel with CHCl<sub>3</sub>. The solution was concentrated and the obtained crude residue was purified by silica gel column chromatography (eluent: hexane/CHCl<sub>3</sub> = 100:0 to 50:50) to afford **5T** (131 mg, 36%). Single crystals of **5T** suitable for X-ray crystallography were obtained from a hexane/CHCl<sub>3</sub> solution.

<sup>1</sup>H NMR (400 MHz, CD<sub>2</sub>Cl<sub>2</sub>, r.t.) δ 7.01 (s, 10H); <sup>1</sup>H NMR (400 MHz, CDCl<sub>3</sub>, r.t.) δ 6.99 (s, 10H); <sup>1</sup>H NMR (400 MHz, CD<sub>2</sub>Cl<sub>2</sub>, -90 °C) δ 7.01 (s, 10H); <sup>13</sup>C NMR (100 MHz, CDCl<sub>3</sub>) δ 137.6 (4°), 124.6 (CH); HRMS (MALDI-TOF MS) *m/z* calcd for C<sub>20</sub>H<sub>10</sub>S<sub>5</sub> [M]<sup>+</sup>: 409.938, found: 409.935; mp: 286.4–289.4 °C (dec.).

### Synthesis of 4,4'-bis(4,4,5,5-tetramethyl-1,3,2-dioxaborolan-2-yl)-3,3'-bithiophene (**2**)

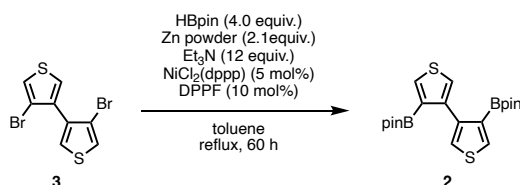

To a 100-mL two-necked flask containing a magnetic stirring bar were added **3** (3.24 g, 10.0 mmol, 1.0 equiv.), 1,3-bis(diphenylphosphino)propane]dichloronickel(II) (NiCl<sub>2</sub>(dppp); 271 mg, 0.500 mmol, 5.0 mol%), 1,1'-bis(diphenylphosphino)ferrocene (DPPF; 554 mg, 1.00 mmol, 10 mol%), and Zn powder (1.34 g, 20.5 mmol, 2.1 equiv.). The flask was then evacuated and backfilled with nitrogen three times, and toluene (20.0 mL) and degassed triethylamine (Et<sub>3</sub>N; 17.0 mL, 122 mmol, 12 equiv.) were added via syringe. Then, 4,4,5,5-tetramethyl-1,3,2-dioxaborolane (HBpin; 5.80 mL, 40.0 mmol, 4.0 equiv.) was added dropwise via syringe, and the resulting solution was refluxed for 60 h. After cooling the mixture to room temperature, the reaction mixture was passed through short-path silica gel with CHCl<sub>3</sub>. The product was extracted with CHCl<sub>3</sub> using a saturated aqueous ammonium chloride solution, washed with water and brine, dried over Na<sub>2</sub>SO<sub>4</sub>, and then evaporated *in vacuo*. The solution was concentrated and the obtained crude residue was purified by silica gel column chromatography (eluent: hexane/CHCl<sub>3</sub> = 90:10 to 0:100) to afford **2** (2.02 g, 48%). Single crystals of **2** suitable for X-ray crystallography were obtained by slow evaporation of hexane solution.

<sup>1</sup>H NMR (400 MHz, CDCl<sub>3</sub>) δ 7.81 (d, *J* = 3.1 Hz, 2H), 7.28 (d, *J* = 3.1 Hz, 2H), 1.22 (s, 24H); <sup>13</sup>C NMR (100 MHz, CDCl<sub>3</sub>) δ 142.3 (4°), 136.6 (br, 4°), 135.5 (CH), 124.2 (CH), 83.4 (4°), 24.8 (CH<sub>3</sub>); HRMS (ESI-TOF MS) *m/z* calcd for C<sub>20</sub>H<sub>28</sub>B<sub>2</sub>O<sub>4</sub>S<sub>2</sub> [M+H]<sup>+</sup>: 419.170, found: 419.171; mp: 116.9–118.6 °C (dec.).

### Synthesis of 4,4''''-dibromo-3,3':4',3'':4'',3''':4''',3''':4''''',3''''':4''''''-sexithiophene (**5**)

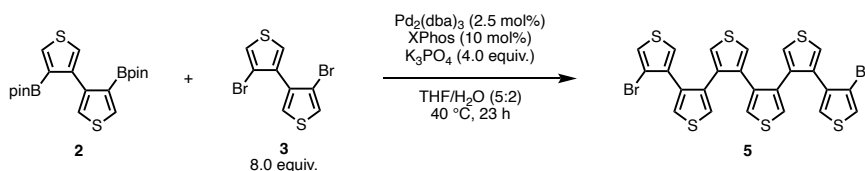

To a 200-mL two-necked round bottom flask containing a magnetic stirring bar were added **2** (1.25 g, 3.00 mmol), **3** (7.78 g, 24.0 mmol, 8.0 equiv.), XPhos (143 mg, 0.300 mmol, 10 mol%),  $\text{K}_3\text{PO}_4 \cdot n\text{H}_2\text{O}$  (3.18 g, 12.0 mmol, 4.0 equiv.), and  $\text{Pd}_2(\text{dba})_3$  (68.7 mg, 0.0750 mmol, 2.5 mol%). The flask was then evacuated and backfilled with nitrogen three times, and THF (45 mL) and degassed water (18 mL) were then added into the flask. The reaction mixture was stirred at 40 °C for 23 h. After quenching the reaction mixture by saturated aqueous ammonium chloride solution, the mixture was extracted with ethyl acetate three times, washed with water and brine, dried over  $\text{Na}_2\text{SO}_4$ , and then evaporated *in vacuo*. The crude residue was purified by short-path silica gel with dry loading (eluent: hexane, then  $\text{CHCl}_3$ ), then silica gel column chromatography (eluent: hexane/ $\text{CHCl}_3$  = 100:10 to 80:20) to afford **5** as an opaque white solid (1.01 g, 52%).

$^1\text{H}$  NMR (400 MHz,  $\text{CD}_2\text{Cl}_2$ )  $\delta$  7.27 (d,  $J$  = 3.4 Hz, 2H), 7.13 (d,  $J$  = 3.5 Hz, 2H), 6.97 (d,  $J$  = 3.4 Hz, 2H), 6.68 (d,  $J$  = 3.4 Hz, 2H), 6.56 (d,  $J$  = 3.4 Hz, 2H), 6.35 (d,  $J$  = 3.5 Hz, 2H);  $^{13}\text{C}$  NMR (100 MHz,  $\text{CD}_2\text{Cl}_2$ )  $\delta$  137.5 (4°), 137.0 (4°), 136.3 (4°), 136.0 (4°), 134.0 (4°), 125.1 (CH), 124.3 (CH), 123.9 (CH), 123.5 (CH), 123.2 (CH), 112.0 (4°); HRMS (MALDI-TOF MS)  $m/z$  calcd for  $\text{C}_{24}\text{H}_{12}\text{Br}_2\text{S}_6$   $[\text{M}+\text{Ag}]^+$ : 758.666, found: 758.664; mp: 184.7–185.9 °C.

## Synthesis of hexa(3,4-thienylene) (6T)

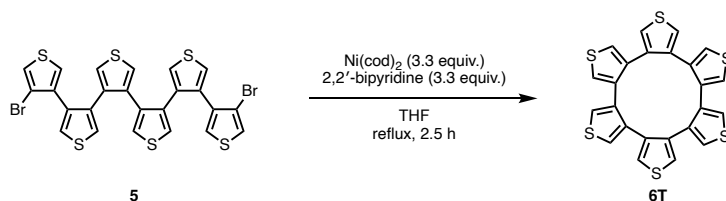

## 2. X-ray Crystallography

Details of the crystal data and a summary of the intensity data collection parameters for **5T**, **2**, and **6T** are listed in Table S2. Suitable crystals were mounted with mineral oil on a MiTeGen MicroMounts and transferred to the goniometer of the kappa goniometer of a RIGAKU XtaLAB Synergy Custom system with equipped with mirror monochromated Mo K $\alpha$  radiation ( $\lambda = 0.71073$  Å) and HyPix-6000HEIC detector. Cell parameters were determined and refined, and raw frame data were integrated using CrysAlisPro (Rigaku Oxford Diffraction, 2018). The structures were solved by dual methods using SHELXT<sup>S4</sup> and refined by full-matrix least-squares techniques against  $F^2$  with SHELXL-2018/3<sup>S5</sup> using Olex2 software package.<sup>S6</sup> The intensities were corrected for Lorentz and polarization effects. All non-hydrogen atoms were refined with anisotropic displacement parameters. Hydrogen atoms were placed using AFIX instructions and refined isotropically.

**Table S2.** Crystallographic data and structure refinement details of **5T**, **2**, and **6T**.

|                                                                                      | <b>5T</b>                                      | <b>2</b>                                                                     | <b>6T</b>                                      |
|--------------------------------------------------------------------------------------|------------------------------------------------|------------------------------------------------------------------------------|------------------------------------------------|
| CCDC No.                                                                             | 2281497                                        | 2281496                                                                      | 2281498                                        |
| formula                                                                              | C <sub>20</sub> H <sub>10</sub> S <sub>5</sub> | C <sub>40</sub> H <sub>56</sub> B <sub>4</sub> O <sub>8</sub> S <sub>4</sub> | C <sub>24</sub> H <sub>12</sub> S <sub>6</sub> |
| fw                                                                                   | 410.58                                         | 836.32                                                                       | 492.70                                         |
| <i>T</i> (K)                                                                         | 123(2)                                         | 123(2)                                                                       | 123(2)                                         |
| $\lambda$ (Å)                                                                        | 0.71073                                        | 0.71073                                                                      | 0.71073                                        |
| cryst syst                                                                           | monoclinic                                     | triclinic                                                                    | monoclinic                                     |
| space group                                                                          | <i>I</i> 2/ <i>a</i>                           | <i>P</i> -1                                                                  | <i>I</i> 2/ <i>a</i>                           |
| <i>a</i> (Å)                                                                         | 12.1542(5)                                     | 10.9669(3)                                                                   | 13.6292(10)                                    |
| <i>b</i> (Å)                                                                         | 10.6118(3)                                     | 11.1772(2)                                                                   | 12.2216(5)                                     |
| <i>c</i> (Å)                                                                         | 13.9023(5)                                     | 19.4756(7)                                                                   | 14.3297(12)                                    |
| $\alpha$ (deg)                                                                       | 90                                             | 86.670(2)                                                                    | 90                                             |
| $\beta$ (deg)                                                                        | 107.303(4)                                     | 85.723(2)                                                                    | 117.598(10)                                    |
| $\gamma$ (deg)                                                                       | 90                                             | 71.102(2)                                                                    | 90                                             |
| <i>V</i> (Å <sup>3</sup> )                                                           | 1711.94(11)                                    | 2250.87(11)                                                                  | 2115.3(3)                                      |
| <i>Z</i>                                                                             | 4                                              | 2                                                                            | 4                                              |
| <i>D</i> <sub>calc</sub> (g·cm <sup>-3</sup> )                                       | 1.593                                          | 1.234                                                                        | 1.547                                          |
| $\mu$ (mm <sup>-1</sup> )                                                            | 0.677                                          | 0.259                                                                        | 0.657                                          |
| <i>F</i> (000)                                                                       | 840.0                                          | 888.0                                                                        | 1008.0                                         |
| cryst size (mm)                                                                      | 0.15 × 0.1 × 0.05                              | 0.11 × 0.08 × 0.05                                                           | 0.2 × 0.1 × 0.1                                |
| 2 $\theta$ range (deg)                                                               | 4.914–62.424                                   | 4.566–62.96                                                                  | 6.846–59.778                                   |
| reflns collected                                                                     | 6906                                           | 39866                                                                        | 7772                                           |
| indep reflns/ <i>R</i> <sub>int</sub>                                                | 2289 / 0.0259                                  | 12381 / 0.0373                                                               | 2457 / 0.0244                                  |
| params                                                                               | 114                                            | 521                                                                          | 136                                            |
| GOF on $F^2$                                                                         | 1.072                                          | 1.157                                                                        | 1.030                                          |
| <i>R</i> <sub>1</sub> , <i>wR</i> <sub>2</sub> [ <i>I</i> > 2 $\sigma$ ( <i>I</i> )] | 0.0319, 0.0805                                 | 0.0692, 0.1534                                                               | 0.0407, 0.1036                                 |
| <i>R</i> <sub>1</sub> , <i>wR</i> <sub>2</sub> (all data)                            | 0.0358, 0.0833                                 | 0.0947, 0.1617                                                               | 0.0547, 0.1127                                 |



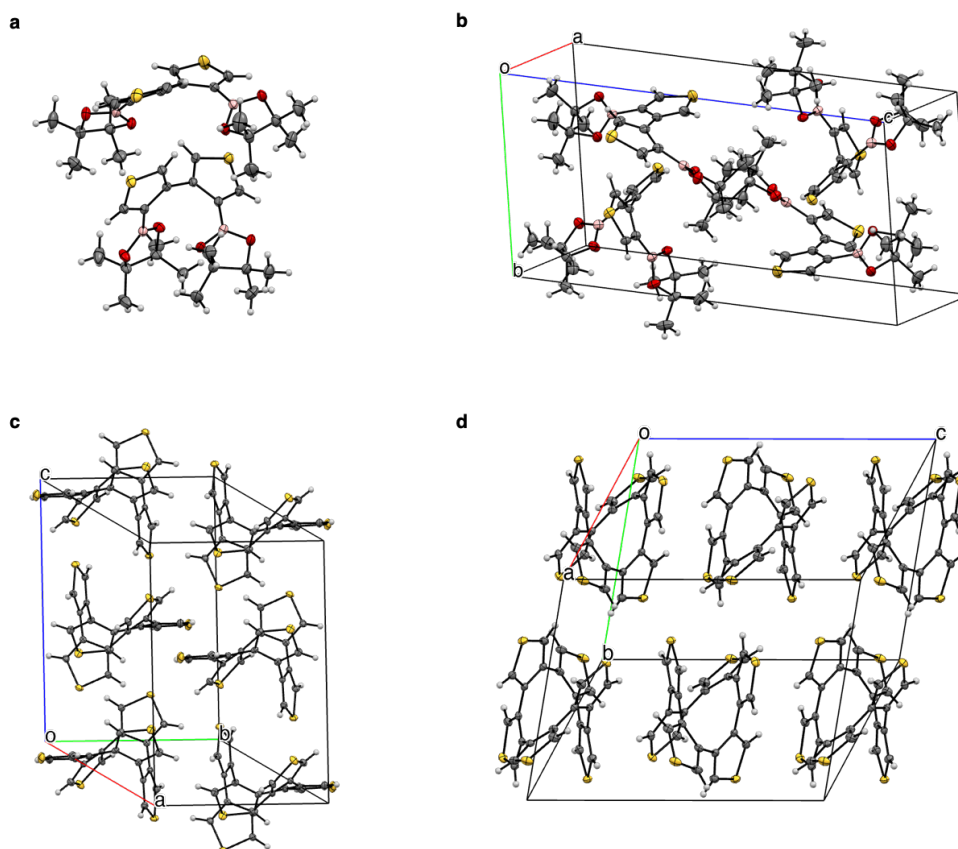

**Fig. S1** (a) Molecular structure of **2** with thermal ellipsoids at 50% probability. (b) Packing structure of **2**. (c) Packing structure of **5T**. (d) Packing structure of **6T**.

### 3. Photophysical Measurement

UV-vis absorption spectra were recorded on a JASCO V-770 spectrometer with a resolution of 0.5 nm. Dilute solutions in spectral-grade dichloromethane in a 1 cm square quartz cell were used for measurements. The longest-wavelength absorption maxima were determined by curve fitting with Gaussian functions.

## 4. Computational Study

The Gaussian 16 program<sup>S7</sup> running on a NEC LX 110Rh system was used for optimization. Structures were optimized at B3LYP/6-31G(d)<sup>S8,S9</sup> with or without Grimme's D3 type dispersion.<sup>S10</sup> NMR chemical shifts are calculated by GIAO<sup>S11</sup> method. Zero-point energy, enthalpy, and Gibbs free energy at 298.15 K and 1 atm were estimated from the gas-phase studies. Harmonic vibration frequency calculation at the same level was performed to verify all stationary points as local minima (with no imaginary frequency) or transition states (with one imaginary frequency). Cartesian coordinates of optimized structures are included in CartesianCoordinates.xyz file.

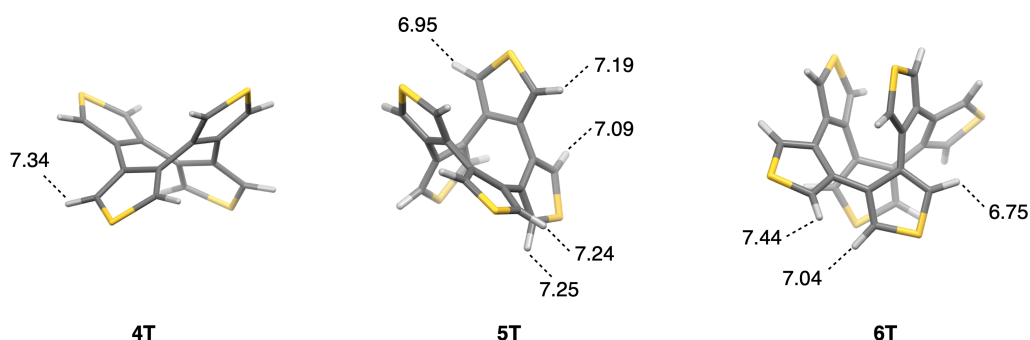

**Fig. S2** Calculated <sup>1</sup>H NMR chemical shifts (ppm) using GIAO B3LYP/6-311+G(2d,p)//B3LYP-D3/6-31G(d) level with tetramethylsilane as a reference (0.00 ppm).

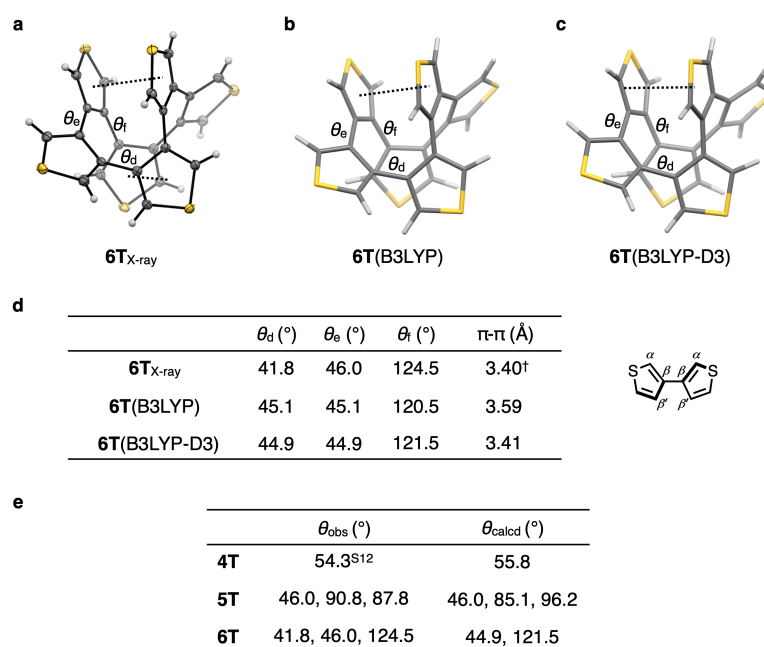

**Fig. S3** Structural parameters of 4T–6T. (a) Structure of 6T determined by X-ray crystallography. (b) Structure of 6T optimized at the B3LYP/6-31G(d) level. (c) Structure of 6T optimized at the B3LYP-D3/6-31G(d) level. (d) Average dihedral angles ( $\alpha$ - $\beta$ - $\beta$ - $\alpha$  and  $\beta$ - $\beta$ - $\beta$ - $\beta$ ) and  $\pi$ - $\pi$  distance. <sup>†</sup>Average of two  $\pi$ - $\pi$  distances. (e) Average dihedral angles in 4T–6T obtained from the X-ray crystal structures and the structures theoretically optimized at the B3LYP-D3/6-31G(d) level.

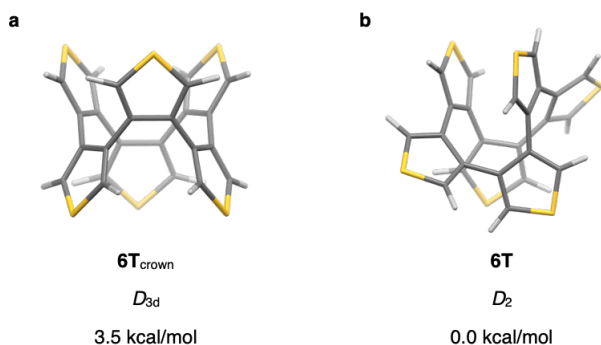

**Fig. S4** Relative Gibbs free energy (sum of electronic and thermal free energy) calculated at the B3LYP-D3/6-31G(d) level. (a)  $D_{3d}$ -Symmetric structure of **6T**. (b)  $D_2$ -Symmetric structure of **6T**.

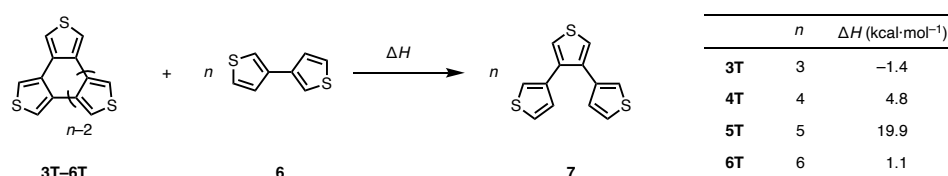

**Fig. S5** Homodesmotic reactions to estimate the strain energies of **3T**–**6T** ( $\Delta H$ , kcal mol<sup>-1</sup>).

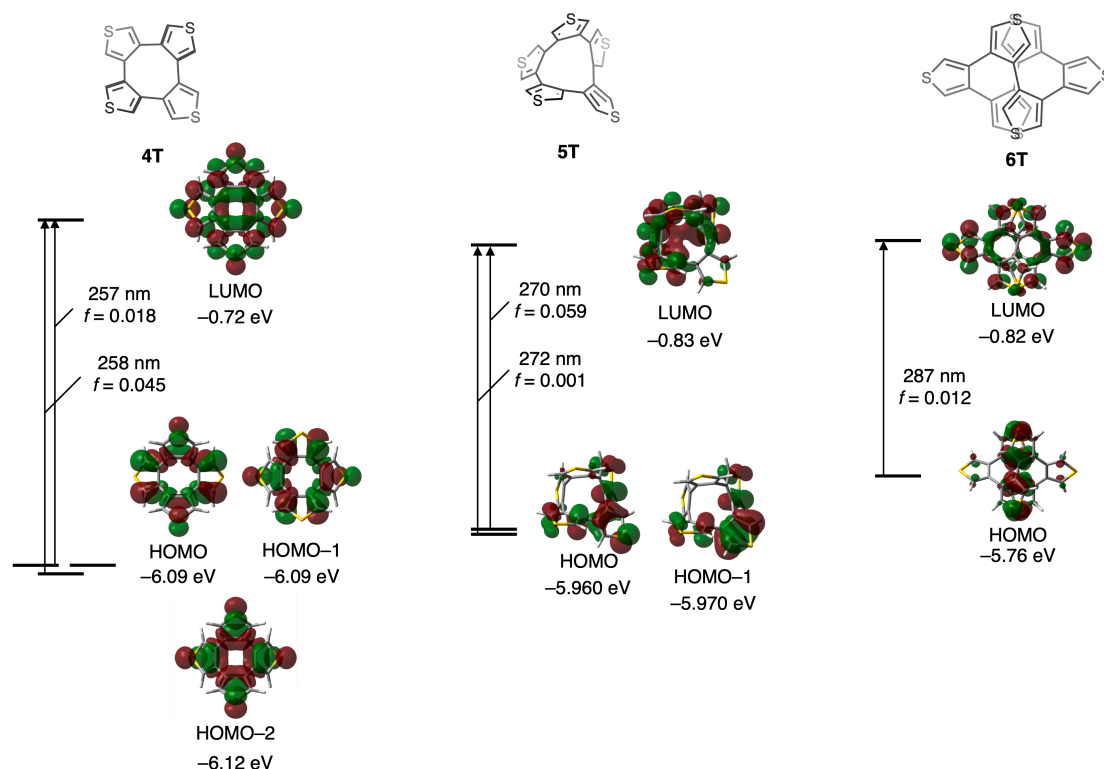

**Fig. S6** Frontier molecular orbitals and energy levels of **4T**, **5T**, and **6T** calculated at the B3LYP-D3/6-31G(d) level (isovalue = 0.03). Excitation energies were calculated by TD-DFT calculations at the same level. The  $f$  values refer to the oscillator strength.

**Table S3.** Uncorrected and thermal-corrected (298 K) energies of stationary points (Hartree).<sup>a</sup>

|                           | <i>E</i>       | <i>E</i> + <i>ZPE</i> | <i>H</i>     | <i>G</i>     |
|---------------------------|----------------|-----------------------|--------------|--------------|
| <b>3T</b>                 | -1655.46266350 | -1655.321723          | -1655.309549 | -1655.359588 |
| <b>4T</b>                 | -2207.27372822 | -2207.085189          | -2207.068756 | -2207.127373 |
| <b>5T</b>                 | -2759.07050599 | -2758.834552          | -2758.813766 | -2758.883284 |
| <b>5T<sub>TS</sub></b>    | -2759.06291372 | -2758.827414          | -2758.807300 | -2758.875348 |
| <b>6T(B3LYP)</b>          | -3310.84731729 | -3310.563934          | -3310.53987  | -3310.615717 |
| <b>6T(B3LYP-D3)</b>       | -3310.92145750 | -3310.637534          | -3310.612819 | -3310.688461 |
| <b>6T<sub>TS</sub></b>    | -3310.87496770 | -3310.591902          | -3310.567571 | -3310.646265 |
| <b>6T<sub>crown</sub></b> | -3310.90814920 | -3310.625340          | -3310.599887 | -3310.682900 |
| <b>6</b>                  | -1104.82703489 | -1104.712578          | -1104.703324 | -1104.747193 |
| <b>7</b>                  | -1656.64784298 | -1656.486009          | -1656.472413 | -1656.527017 |

<sup>a</sup> *E*: electronic energy; *ZPE*: zero-point energy; *H* ( $= E + ZPE + E_{\text{vib}} + E_{\text{rot}} + E_{\text{trans}} + RT$ ): sum of electronic and thermal enthalpies; *G* ( $= H - TS$ ): sum of electronic and thermal free energies.

## 5. References

- [S1] K. Kise, F. Chen, K. Kato, T. Tanaka and A. Osuka, *Chem. Lett.*, 2017, **46**, 1319–1322.
- [S2] A. Rajca, M. Miyasaka, M. Pink, H. Wang and S. Rajca, *J. Am. Chem. Soc.*, 2004, **126**, 15211–15222.
- [S3] S. Zhang, X. Liu, C. Li, L. Li, J. Song, J. Shi, M. Morton, S. Rajca, A. Rajca and H. Wang, *J. Am. Chem. Soc.*, 2016, **138**, 10002–10010.
- [S4] G. M. Sheldrick, *Acta Crystallogr.* 2015, **A71**, 3–8.
- [S5] G. M. Sheldrick, *Acta Crystallogr.* 2015, **C71**, 3–8.
- [S6] O. V. Dolomanov, L. J. Bourhis, R. J. Gildea, J. A. K. Howard and H. Puschmann, *J. Appl. Crystallogr.* 2009, **42**, 339–341.
- [S7] M. J. Frisch, G. W. Trucks, H. B. Schlegel, G. E. Scuseria, M. A. Robb, J. R. Cheeseman, G. Scalmani, V. Barone, G. A. Petersson, H. Nakatsuji, X. Li, M. Caricato, A. V. Marenich, J. Bloino, B. G. Janesko, R. Gomperts, B. Mennucci, H. P. Hratchian, J. V. Ortiz, A. F. Izmaylov, J. L. Sonnenberg, D. Williams-Young, F. Ding, F. Lipparini, F. Egidi, J. Goings, B. Peng, A. Petrone, T. Henderson, D. Ranasinghe, V. G. Zakrzewski, J. Gao, N. Rega, G. Zheng, W. Liang, M. Hada, M. Ehara, K. Toyota, R. Fukuda, J. Hasegawa, M. Ishida, T. Nakajima, Y. Honda, O. Kitao, H. Nakai, T. Vreven, K. Throssell, J. A. Montgomery, Jr., J. E. Peralta, F. Ogliaro, M. J. Bearpark, J. J. Heyd, E. N. Brothers, K. N. Kudin, V. N. Staroverov, T. A. Keith, R. Kobayashi, J. Normand, K. Raghavachari, A. P. Rendell, J. C. Burant, S. S. Iyengar, J. Tomasi, M. Cossi, J. M. Millam, M. Klene, C. Adamo, R. Cammi, J. W. Ochterski, R. L. Martin, K. Morokuma, O. Farkas, J. B. Foresman and D. J. Fox, Gaussian 16, Revision B.01, Gaussian, Inc., Wallingford CT, 2016.
- [S8] A. D. Becke, *J. Chem. Phys.* 1993, **98**, 5648–5652.
- [S9] C. Lee, W. Yang and R. G. Parr, *Phys. Rev. B* 1988, **37**, 785–789.
- [S10] S. Grimme, J. Antony, S. Ehrlich and H. Krieg, *J. Chem. Phys.*, 2010, **132**, 154104.
- [S11] K. Wolinski, J. F. Hinton and P. Pulay, *J. Am. Chem. Soc.*, 1990, **112**, 8251–8260.
- [S12] T. Fujimoto, R. Suizu, H. Yoshikawa and K. Awaga, *Chem. Eur. J.*, 2008, **14**, 6053.

## 6. $^1\text{H}$ NMR, $^{13}\text{C}$ NMR and Mass Spectra of Products

$^1\text{H}$  NMR spectrum of **4** (400 MHz,  $\text{CDCl}_3$ )

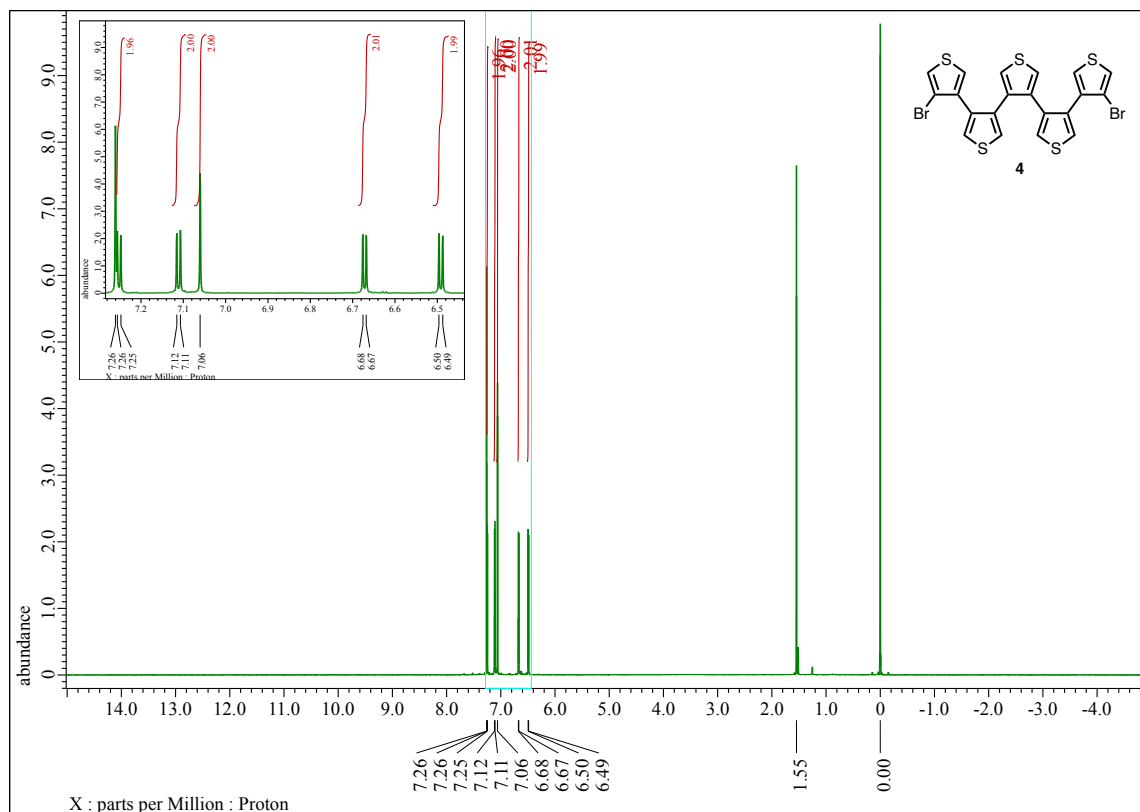

$^{13}\text{C}$  NMR spectrum of **4** (100 MHz,  $\text{CDCl}_3$ )

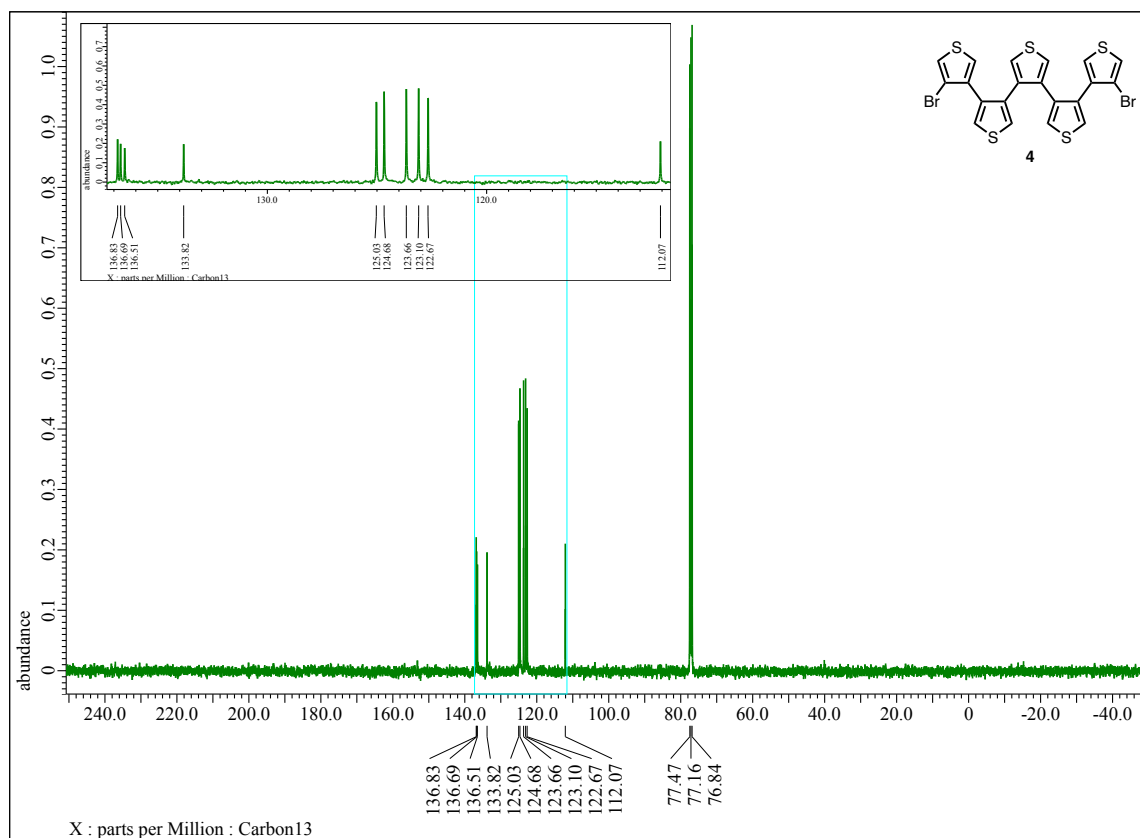

Mass spectrum of **4** (MALDI-TOF MS)

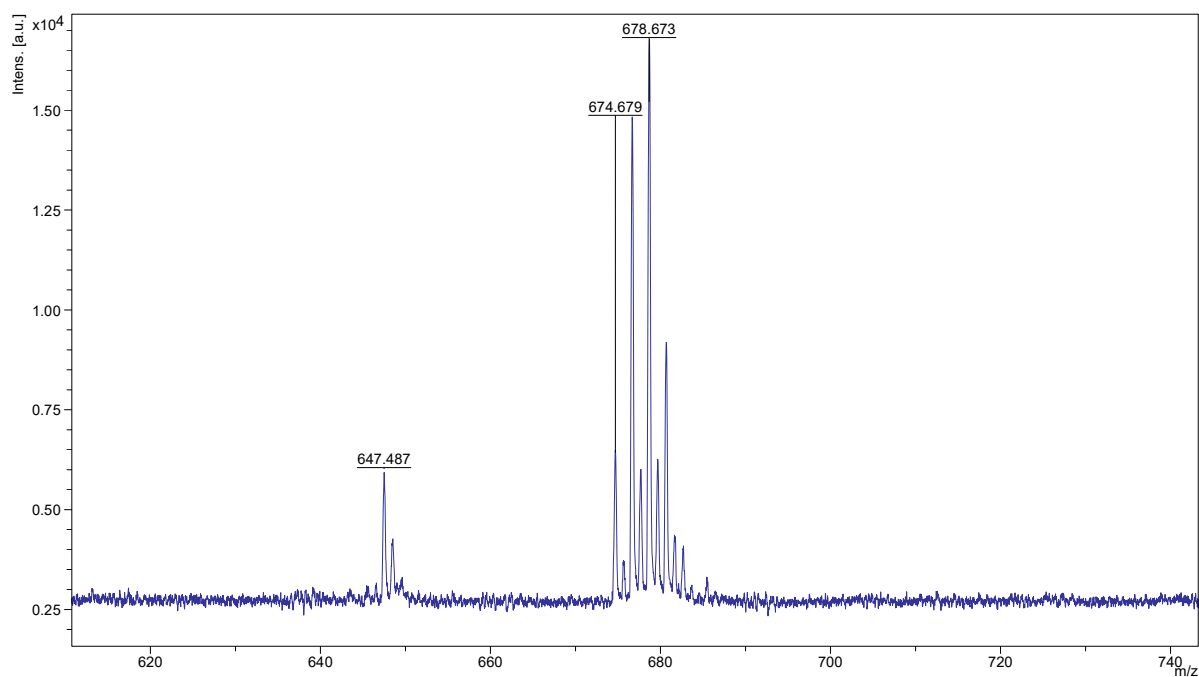

$^1\text{H}$  NMR spectrum of **5T** (400 MHz,  $\text{CD}_2\text{Cl}_2$ ) at room temperature

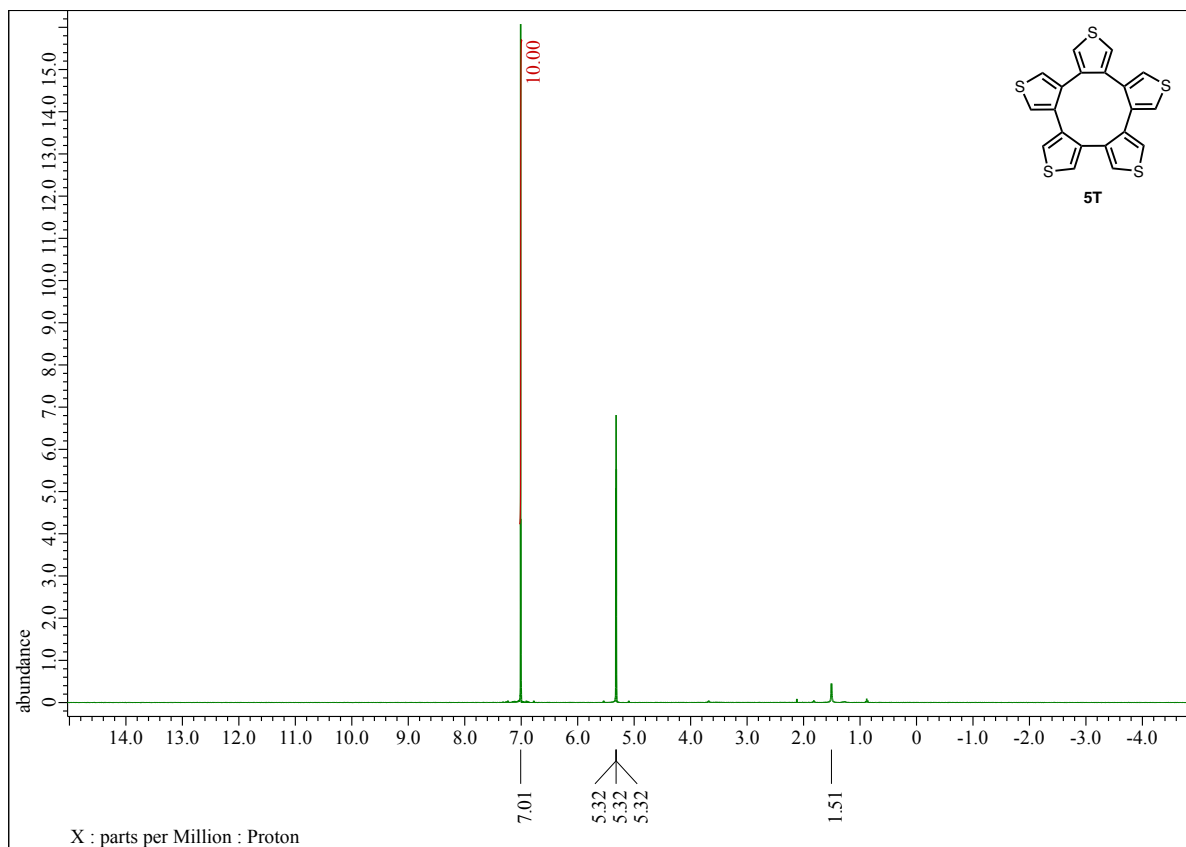

$^1\text{H}$  NMR spectrum of **5T** (400 MHz,  $\text{CDCl}_3$ ) at room temperature

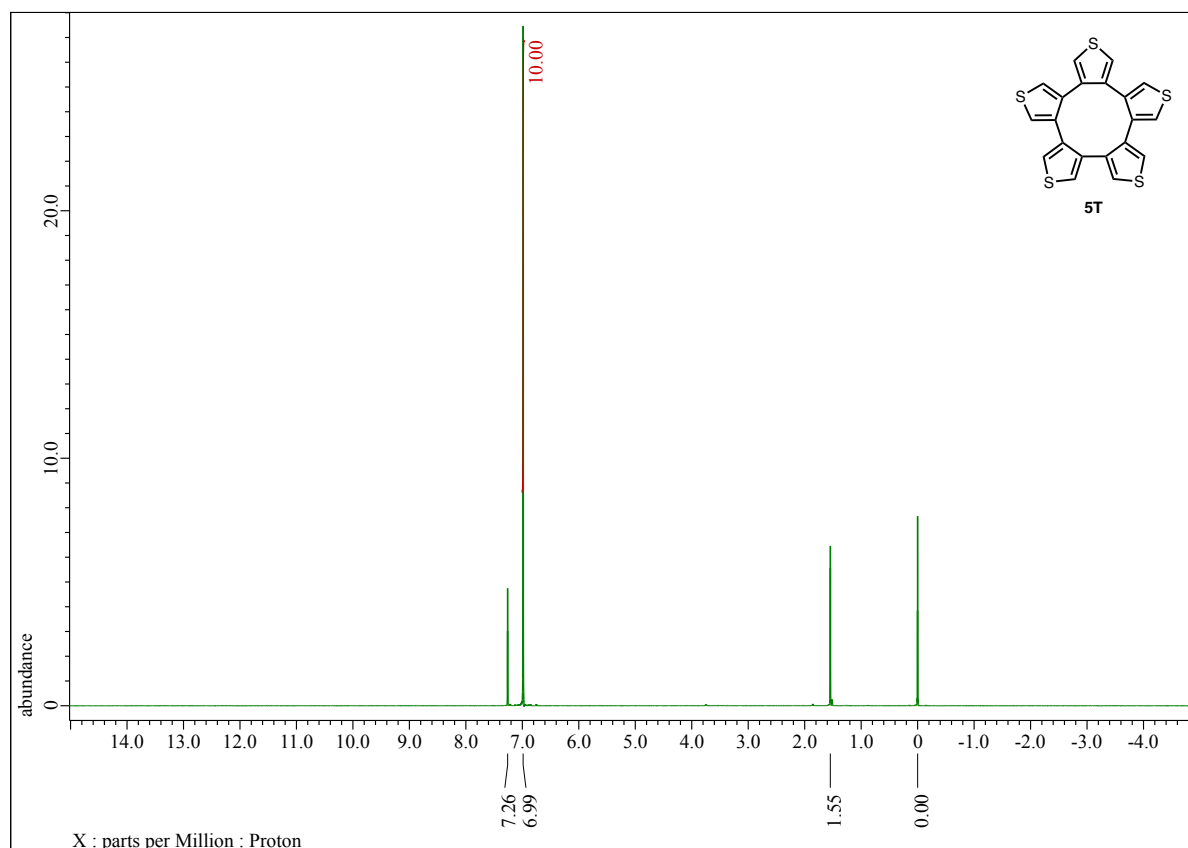

$^1\text{H}$  NMR spectrum of **5T** (400 MHz,  $\text{CD}_2\text{Cl}_2$ ) at  $-90^\circ\text{C}$

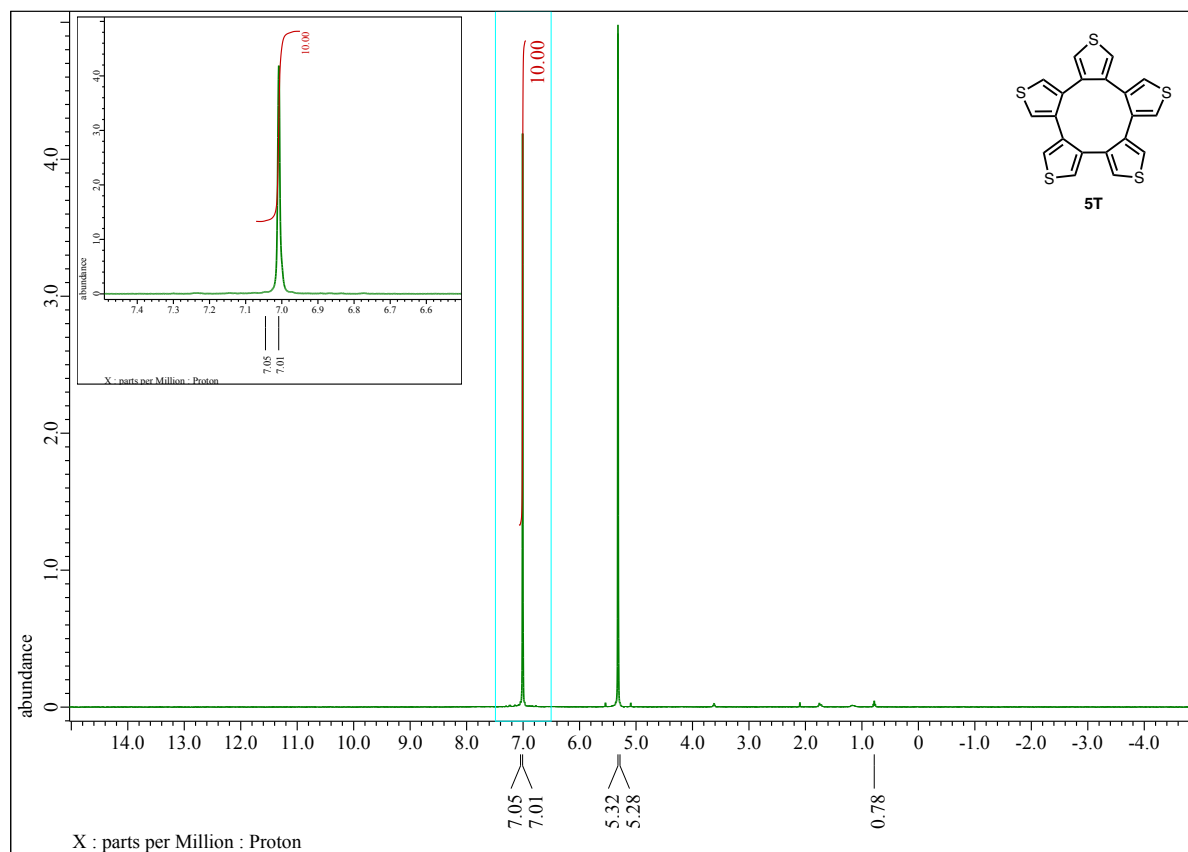



$^{13}\text{C}$  NMR spectrum of **5T** (100 MHz,  $\text{CDCl}_3$ )

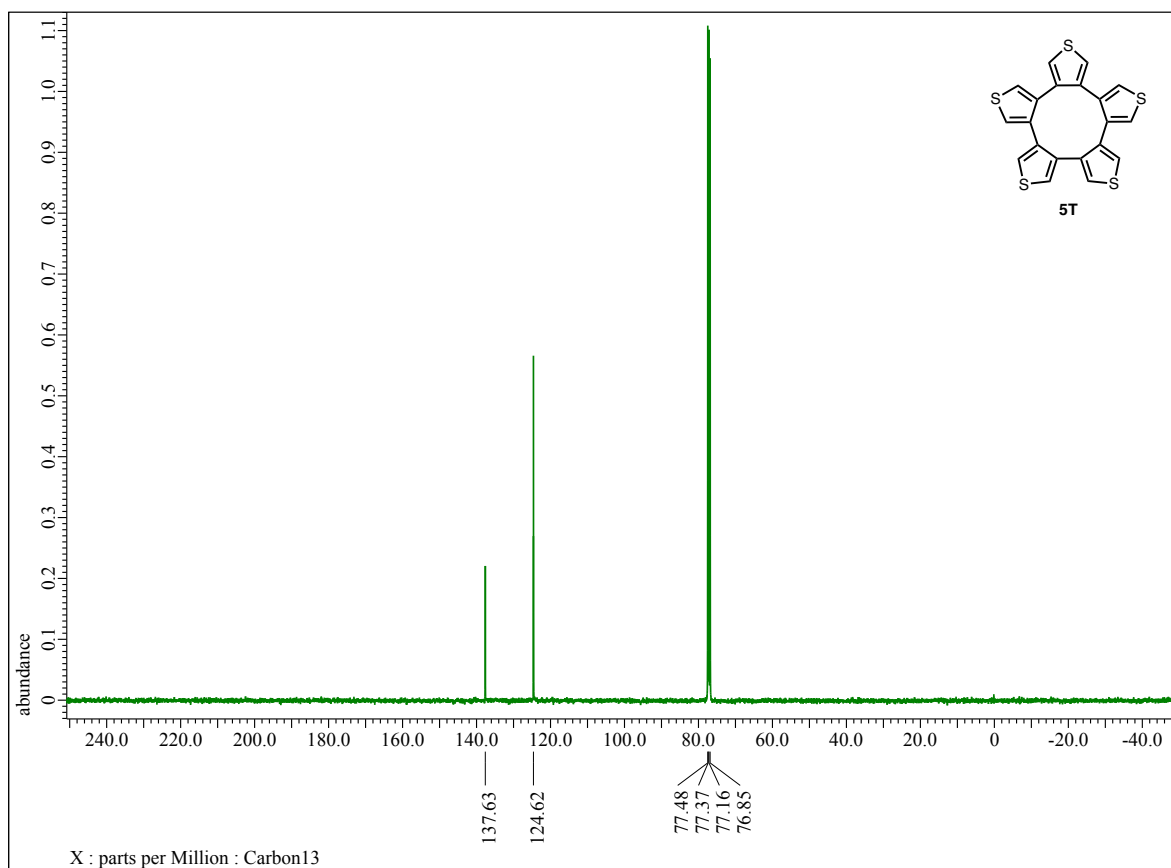

Mass spectrum of **5T** (MALDI-TOF MS)

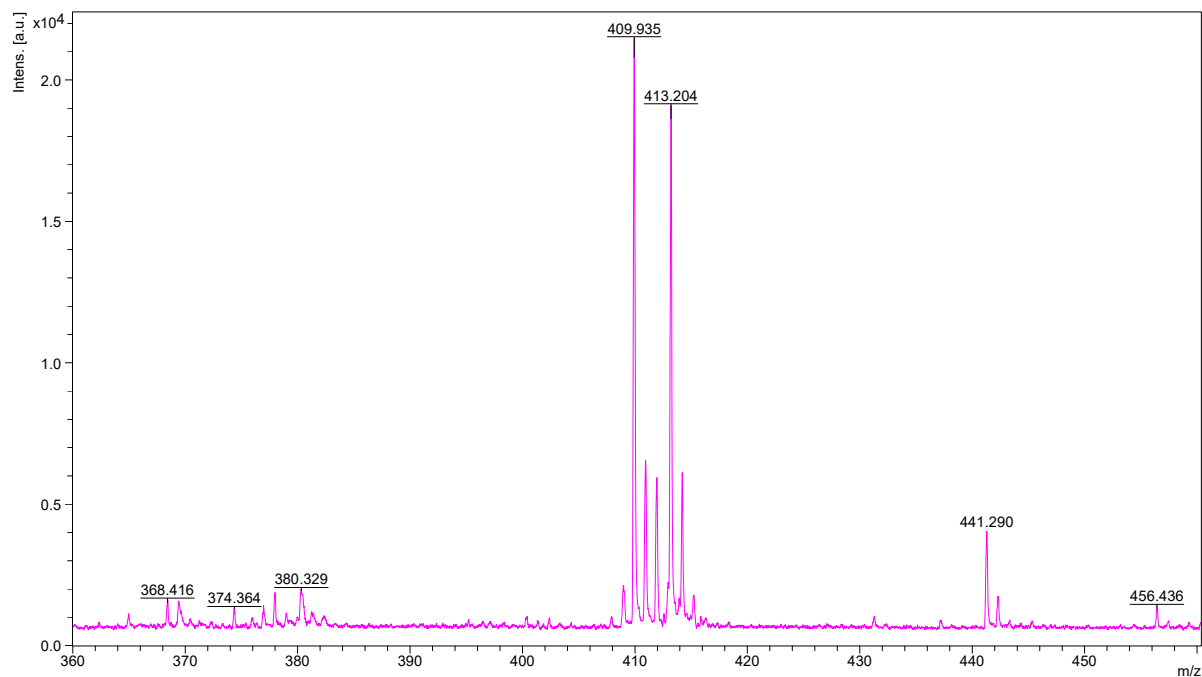

$^1\text{H}$  NMR spectrum of **2** (400 MHz,  $\text{CDCl}_3$ )

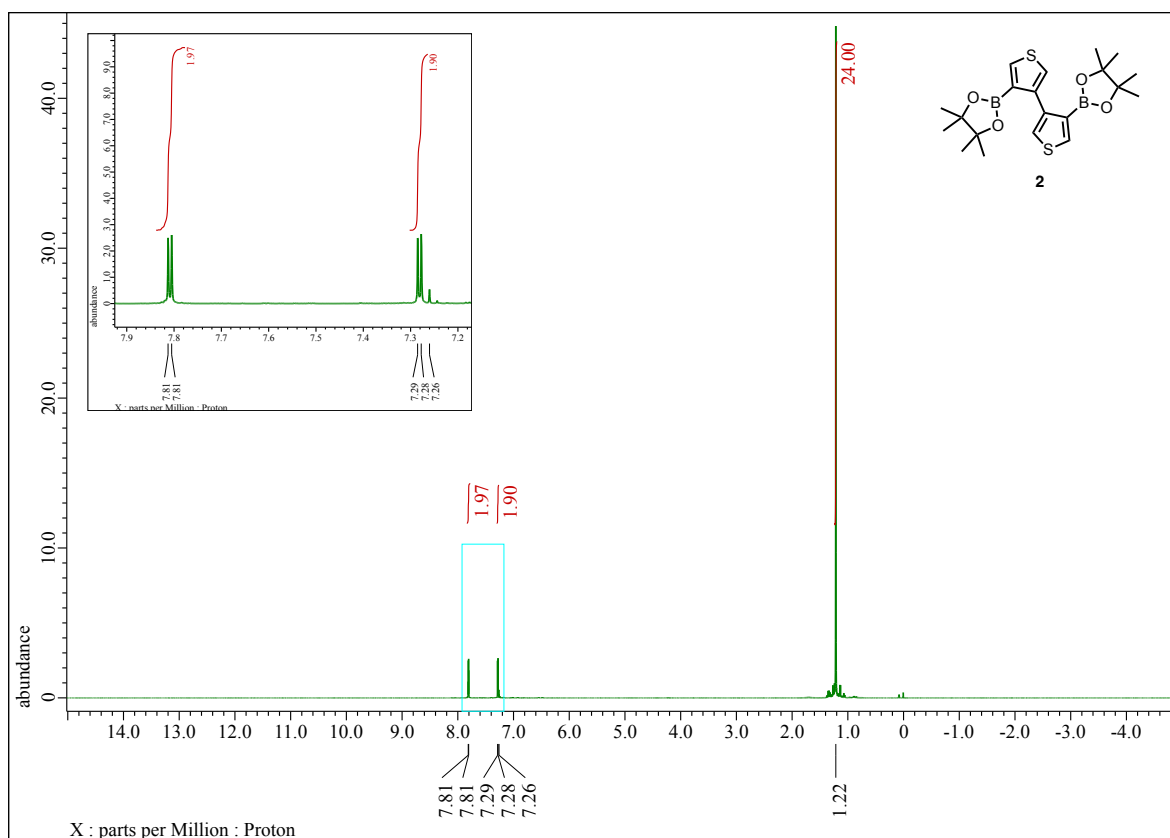

$^{13}\text{C}$  NMR spectrum of **2** (100 MHz,  $\text{CDCl}_3$ )

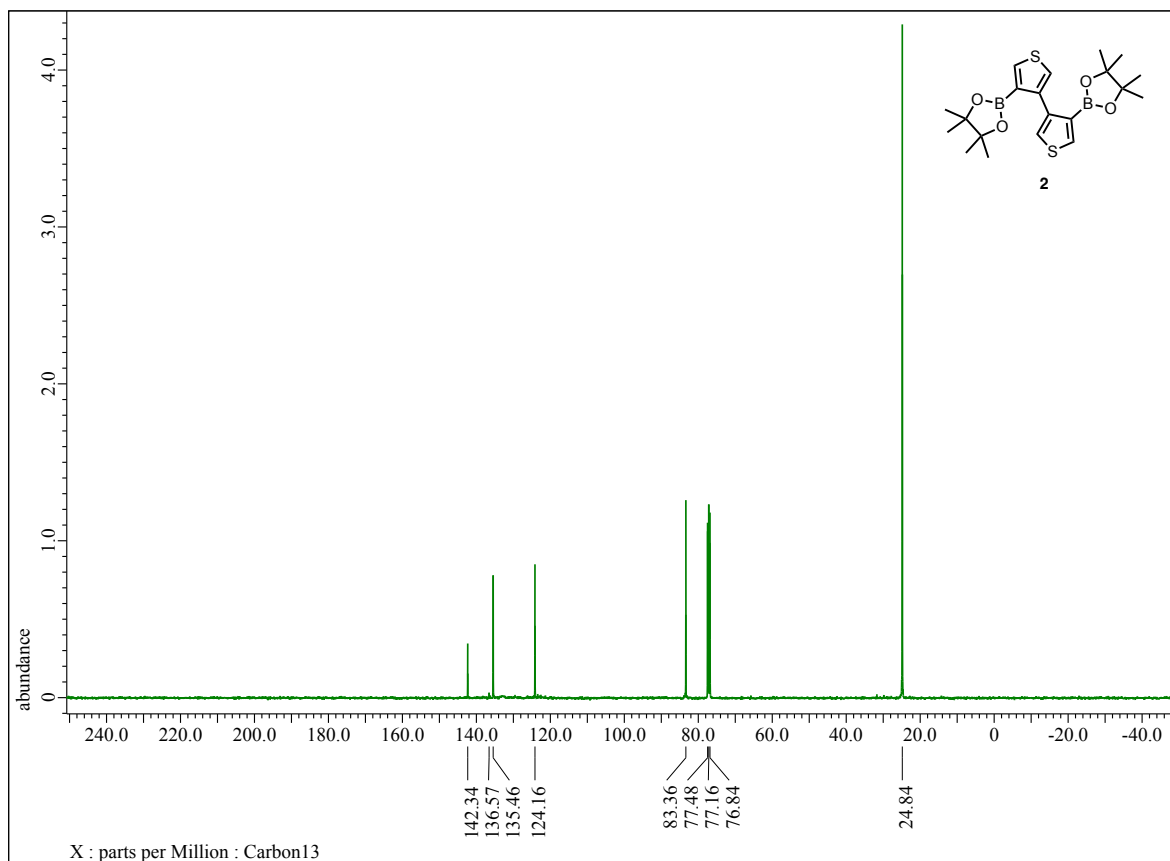

Mass spectrum of **2** (ESI-TOF MS)

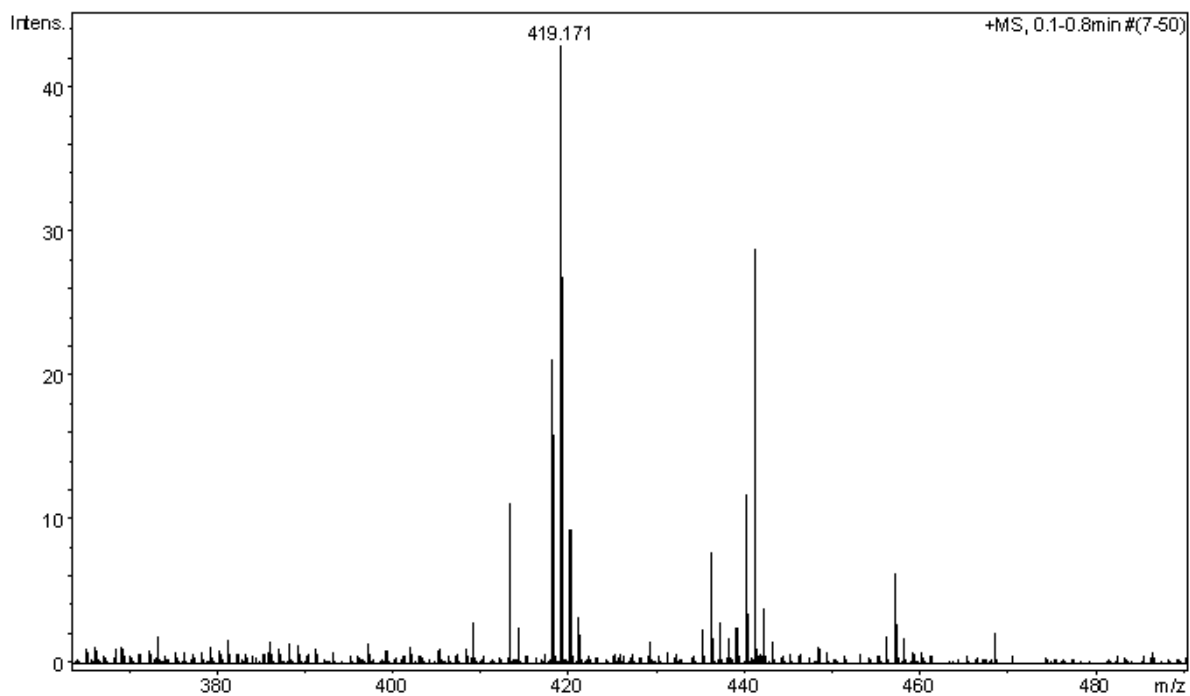

$^1\text{H}$  NMR spectrum of **5** (400 MHz,  $\text{CD}_2\text{Cl}_2$ )

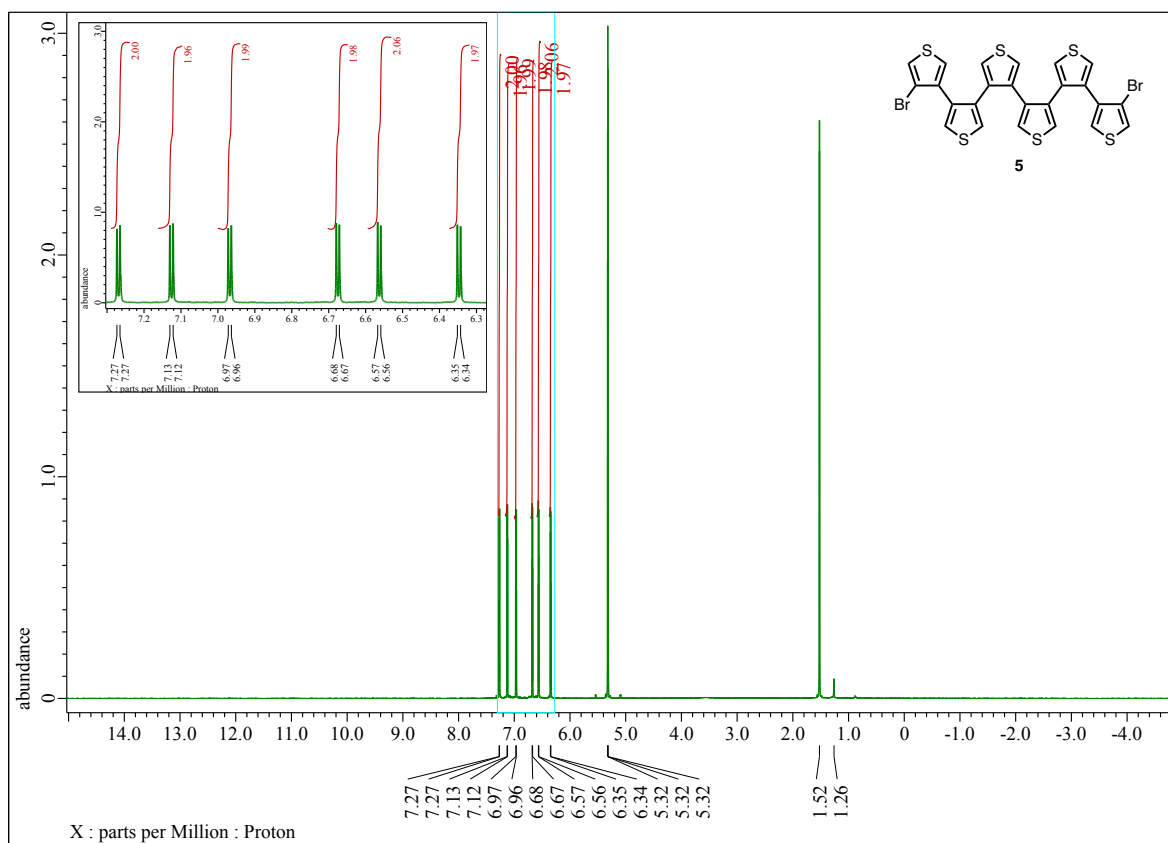

$^{13}\text{C}$  NMR spectrum of **5** (100 MHz,  $\text{CD}_2\text{Cl}_2$ )

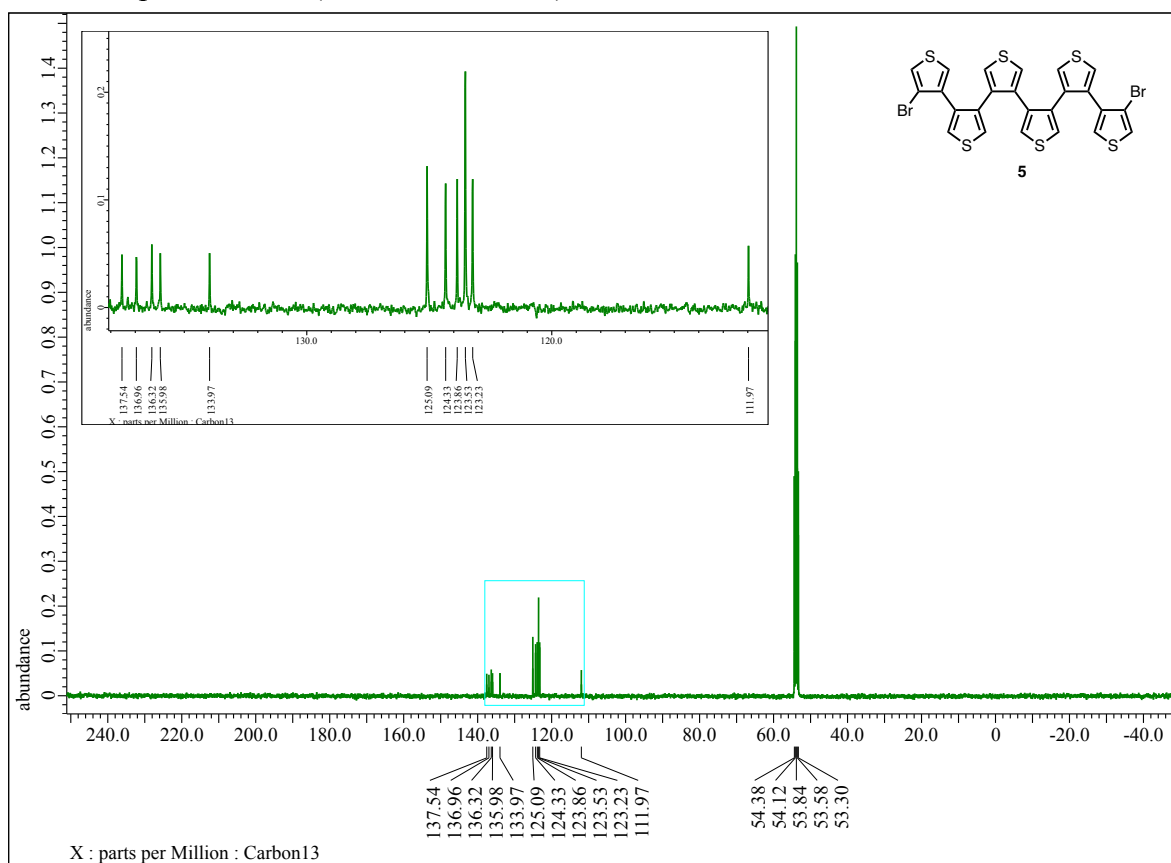

Mass spectrum of **5** (MALDI-TOF MS)

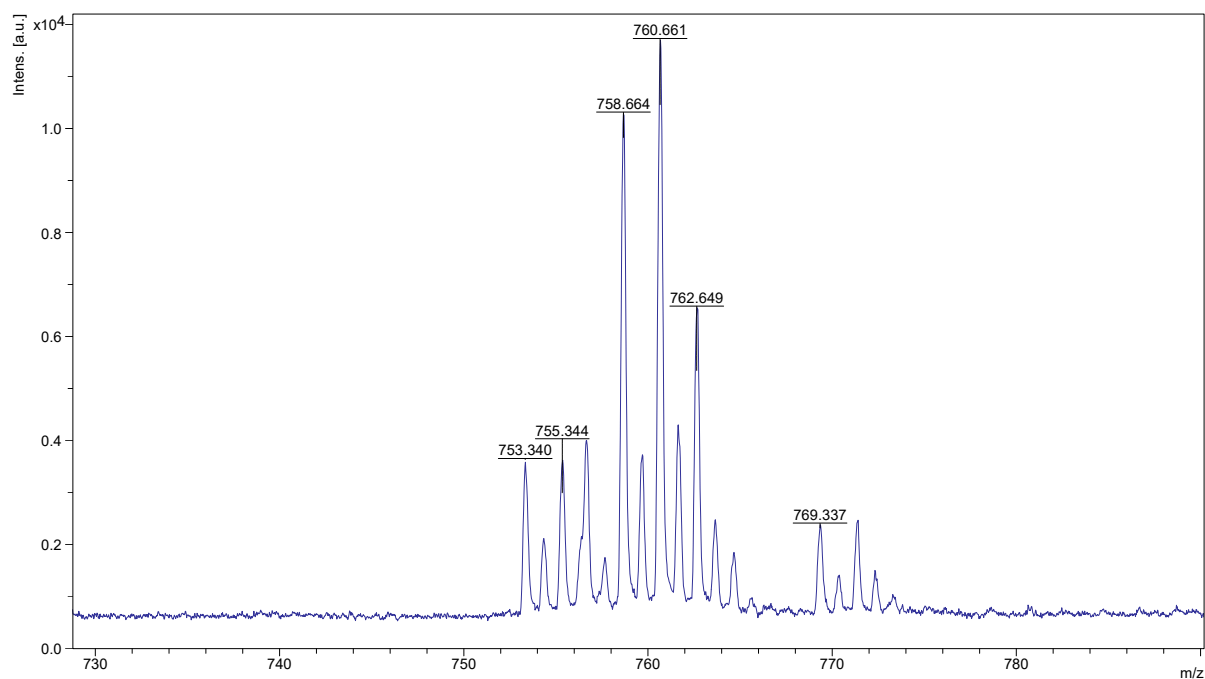

$^1\text{H}$  NMR spectrum of **6T** (400 MHz,  $\text{CD}_2\text{Cl}_2$ ) at room temperature

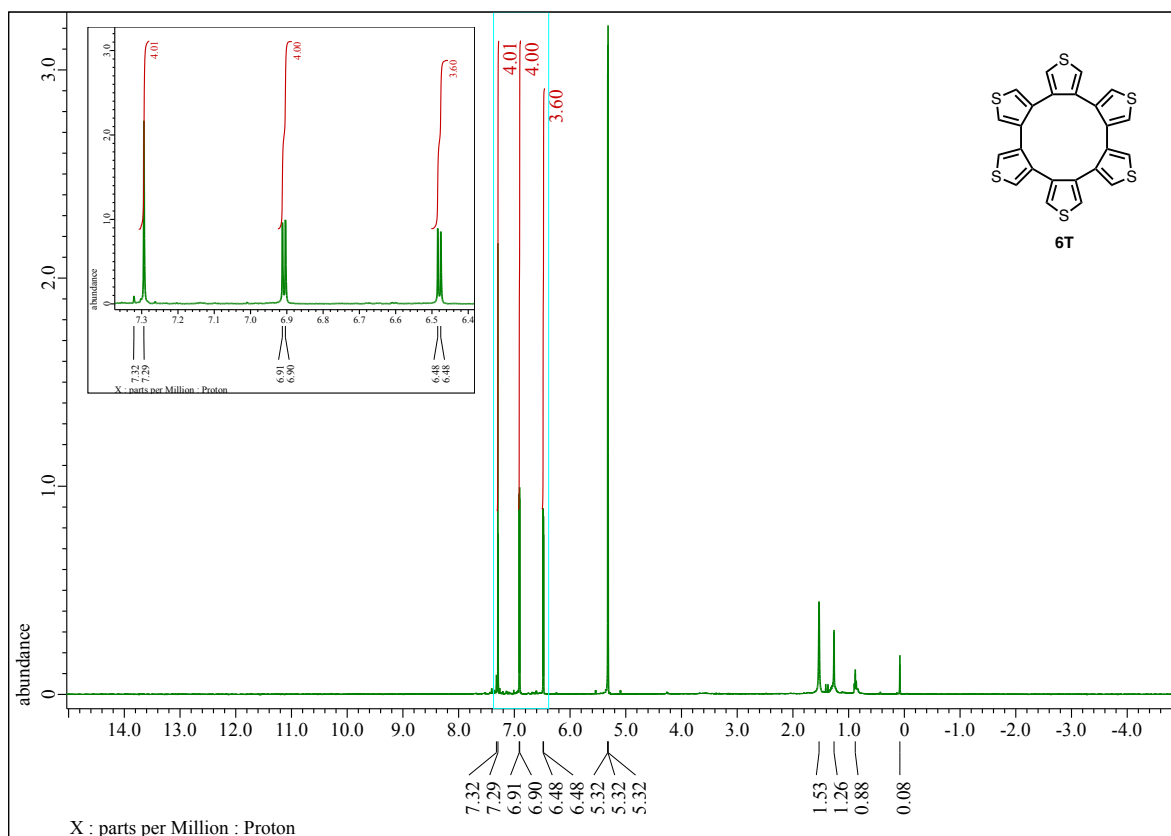

$^1\text{H}$  NMR spectrum of **6T** (400 MHz,  $\text{C}_2\text{D}_2\text{Cl}_4$ ) at 140 °C

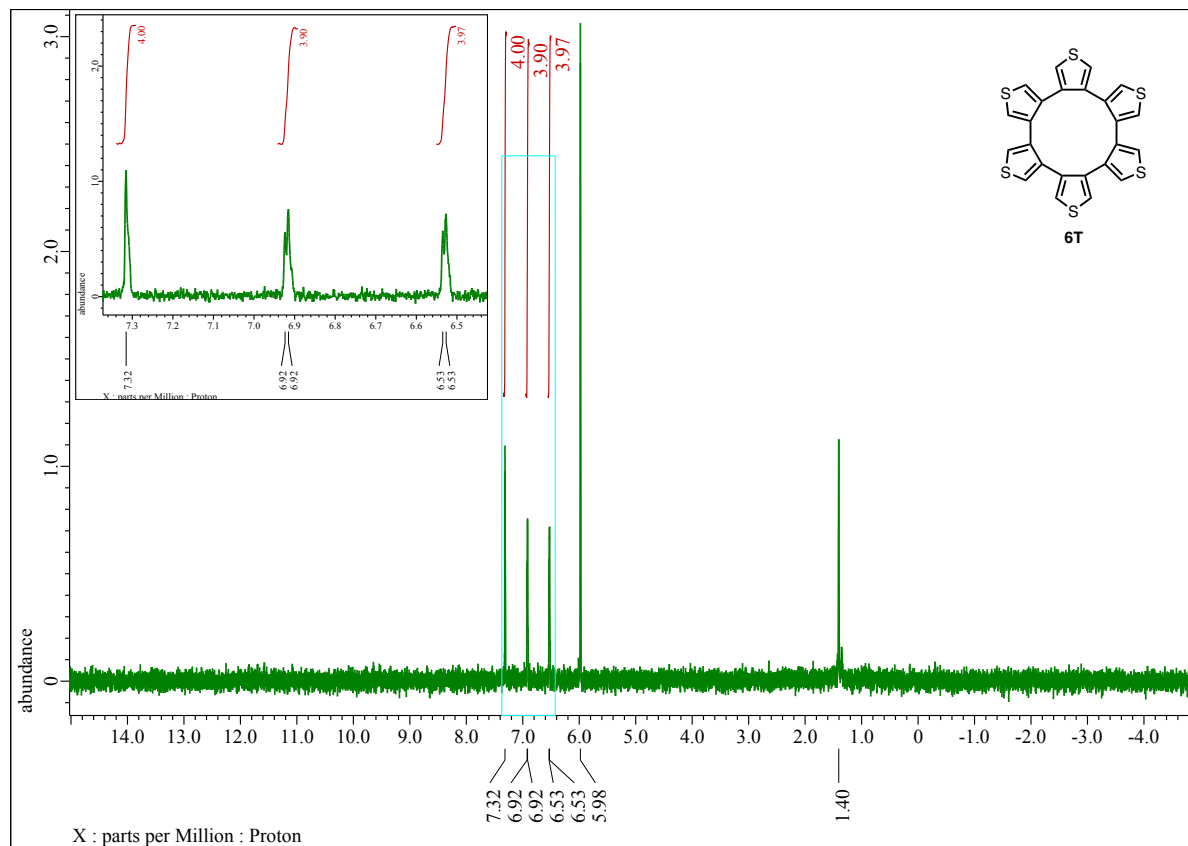

$^{13}\text{C}$  NMR spectrum of **6T** (100 MHz,  $\text{CDCl}_3$ )

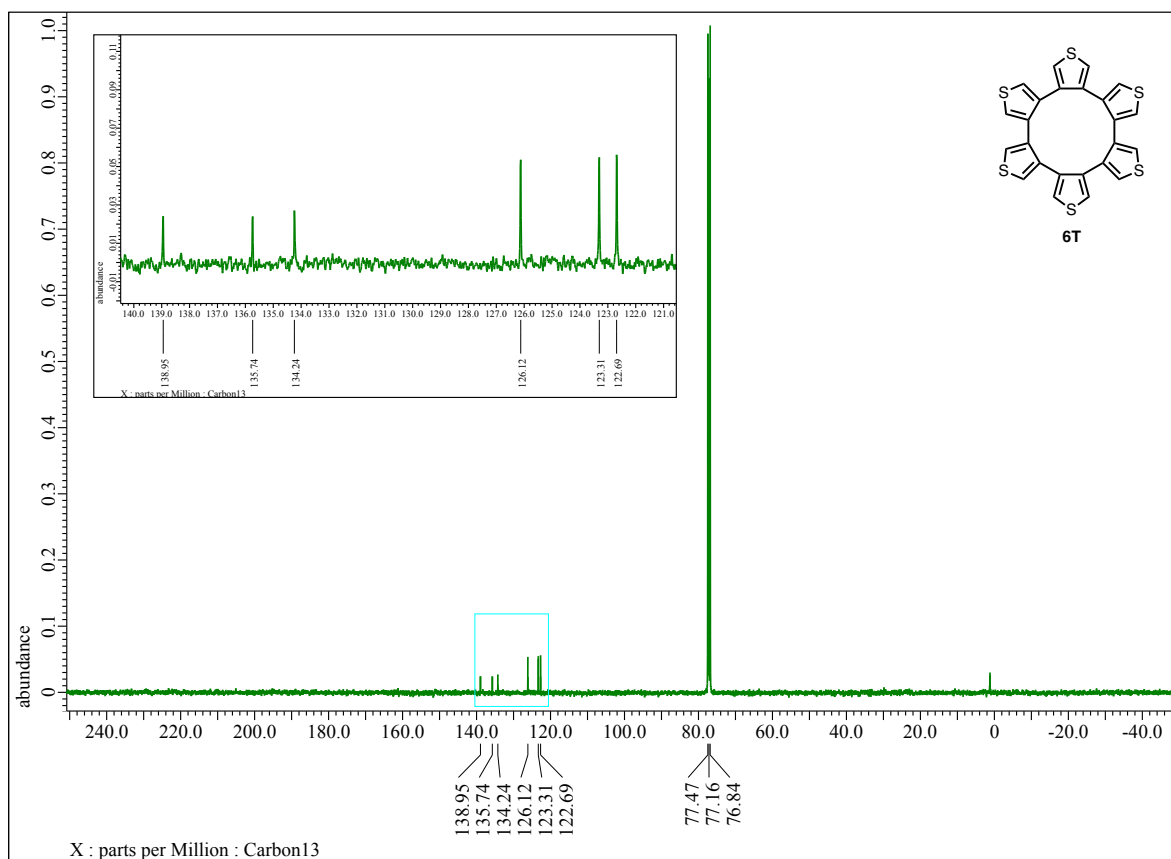

Mass spectrum of **6T** (MALDI-TOF MS)

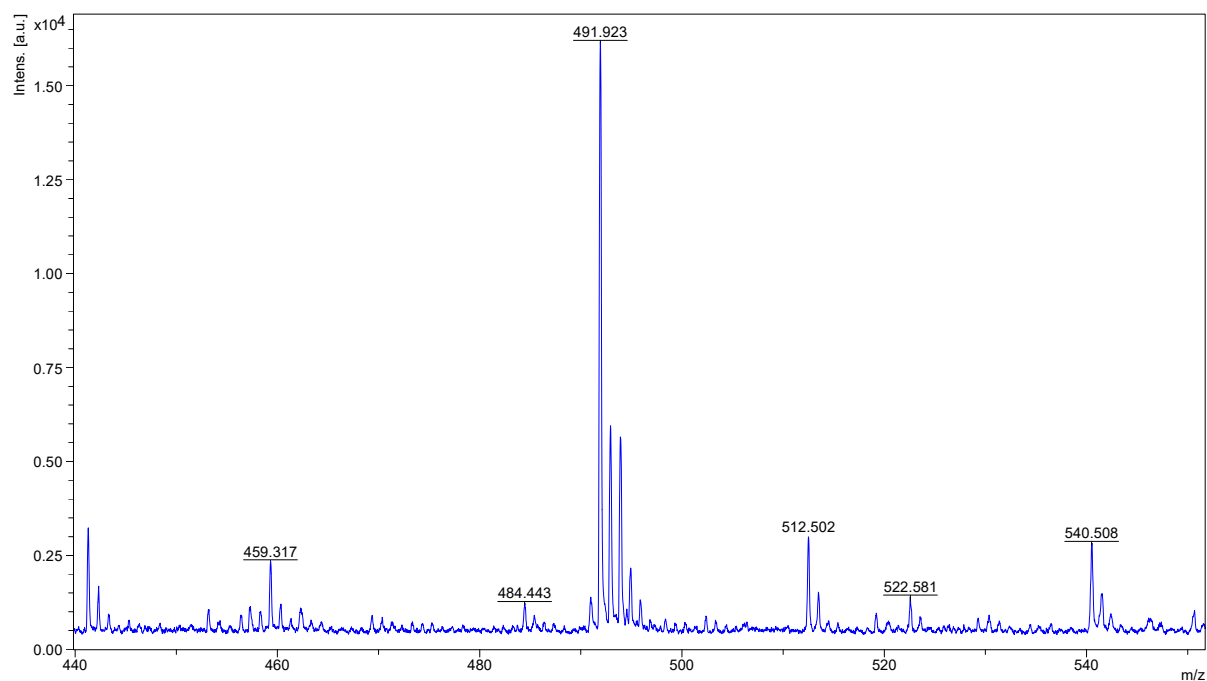

$^1\text{H}$  NMR spectrum of **4T** (400 MHz,  $\text{CD}_2\text{Cl}_2$ )

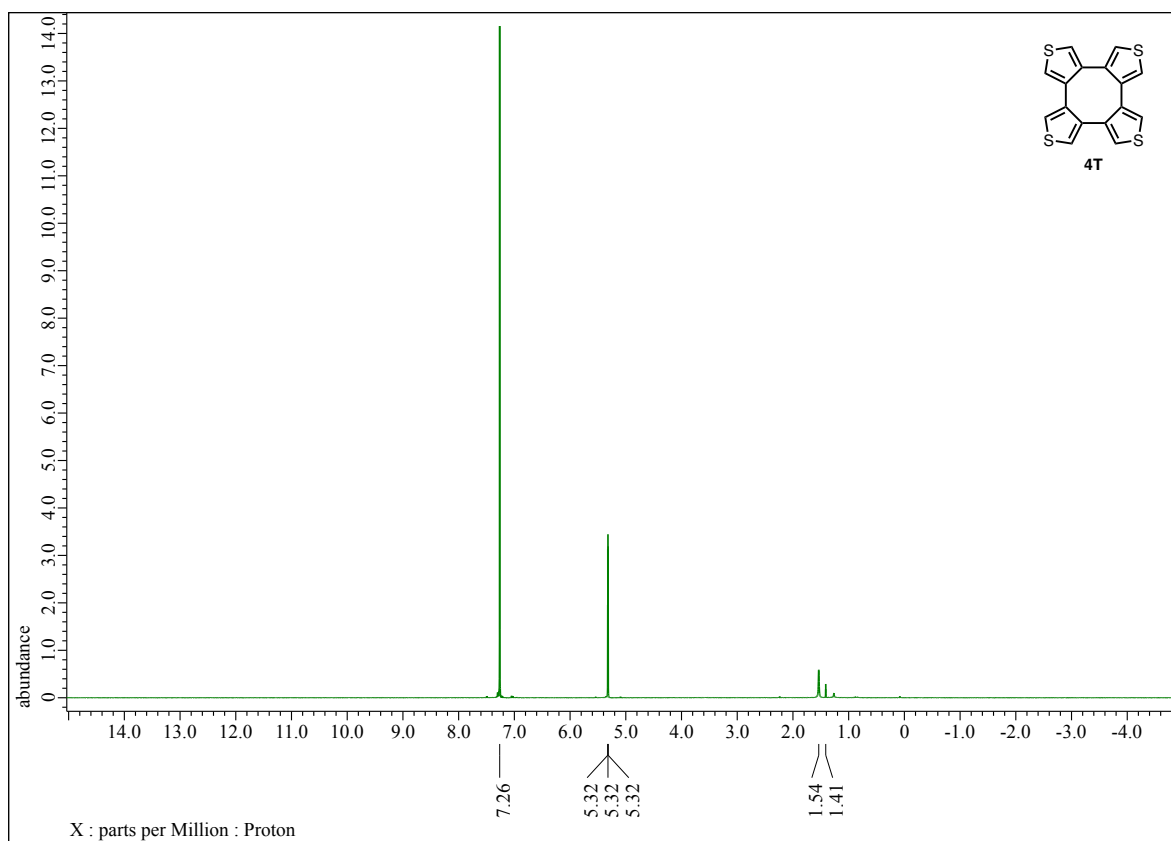

Supplement: d3cc03508e2.pdf [file d3cc03508e2.pdf]
